# Supplementary material
Source: Springer Nature journal article supplement (https://www.springermedizin.de/resource/supplementary/13012_2012_575_MOESM2_ESM.pdf/9630474)

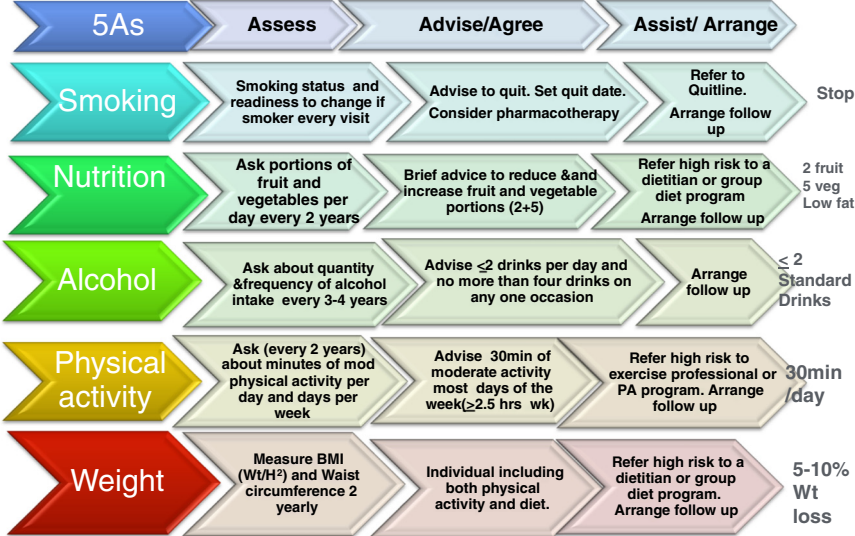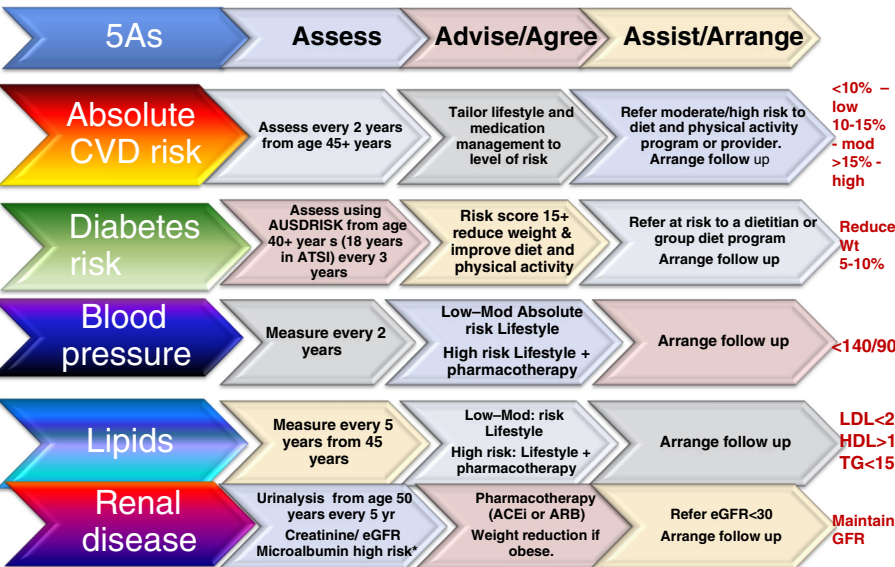

\*High risk: hypertension, diabetes, obesity, ATSI or family history every 1 year

Supplement: MOESM2 [file 9630474]
